# Supplementary material
Source: PubMed Central journal article supplement (PMC6156989)
Supplement: NIHMS986547-supplement-2.pdf [file NIHMS986547-supplement-2.pdf]

Supporting information

## **Gold Nanorod-Photothermal Therapy Alters Cell Junctions and Actin Network in Inhibiting Cancer Cell Collective Migration**

Yue Wu <sup>∞Ψ</sup>; Moustafa R. K. Ali <sup>∞Ψ</sup>; Bin Dong <sup>Δ</sup>; Tiegang Han<sup>∞</sup>; Kuangcai Chen <sup>Δ</sup>; Jin Chen <sup>σ, ζ</sup>;  
Yan Tang <sup>φ</sup>, Ning Fang <sup>Δ, \*</sup>; Fangjun Wang <sup>σ, \*</sup>; Mostafa A. El-Sayed <sup>∞ \*</sup>

*∞ Laser Dynamics Lab, School of Chemistry and Biochemistry, Georgia Institute of Technology, Atlanta, Georgia 30332-0400, USA*

*Δ Department of Chemistry, Georgia State University, P.O. Box 3965, Atlanta, Georgia 30302*

*σ CAS Key Laboratory of Separation Sciences for Analytical Chemistry, National Chromatographic R&A Center, Dalian Institute of Chemical Physics, Chinese Academy of Sciences (CAS), Dalian 116023, Liaoning, P. R. China*

*φ Department of Medicine, Pulmonary and Critical Care Medicine, Brigham and Women's Hospital and Harvard Medical School, Boston, MA, USA*

*ζ University of Chinese Academy of Sciences, Beijing 100049, China*

*Ψ Equal contribution*

*\* Corresponding authors:*

- Ning Fang, Department of Chemistry, Georgia State University, P.O. Box 3965, Atlanta, Georgia 30302, USA. E-mail: [nfang@gsu.edu](mailto:nfang@gsu.edu)
- Fangjun Wang, CAS Key Laboratory of Separation Sciences for Analytical Chemistry, National Chromatographic R&A Center, Dalian Institute of Chemical Physics, Chinese Academy of Sciences (CAS), Dalian 116023, Liaoning, P. R. China. E-mail: [wangfj@dicp.ac.cn](mailto:wangfj@dicp.ac.cn)
- Mostafa A. El-Sayed, Laser Dynamics Lab, School of Chemistry and Biochemistry, Georgia Institute of Technology, Atlanta, Georgia 30332-0400, USA, E-mail: [melsayed@gatech.edu](mailto:melsayed@gatech.edu)



## Figures

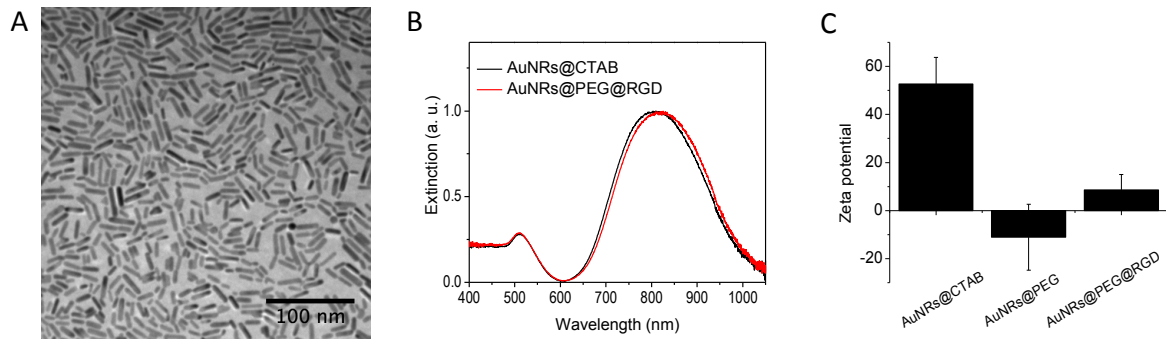

**Figure S1.** AuNR synthesis and characterization. (A) TEM image of AuNRs. (B) UV-Vis spectra of AuNRs with different surface ligands. Black, the as-synthesized AuNRs with CTAB on the surface; red, AuNRs conjugated with PEG and RGD. (C) Zeta potential of AuNRs before/after conjugations (n=3).

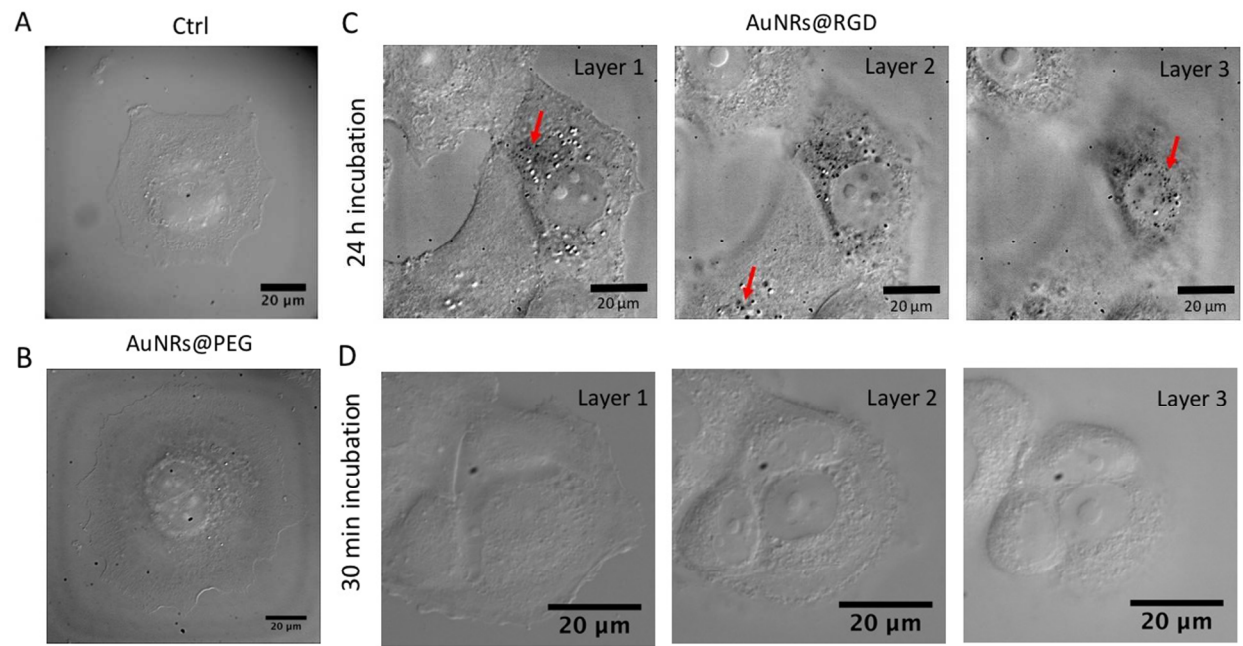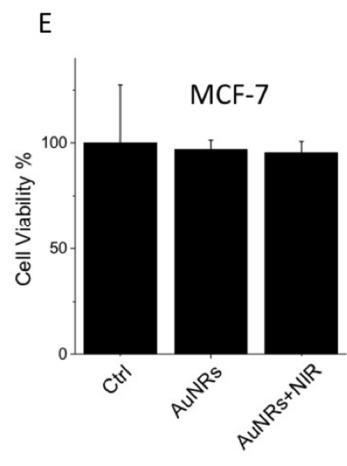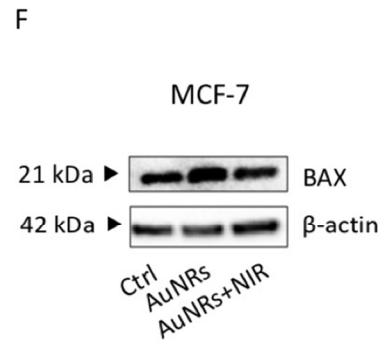

**Figure S2.** Cellular uptake and cytotoxicity of AuNRs treatments of MCF-7 cells. (A-D) Differential interference contrast (DIC) microscopic images of MCF-7 cells without AuNRs (A) and with AuNRs@PEG (B), or with AuNRs@RGD for 24 h (C) and 30 min (D) with Z-scanning. The red arrow indicates the locations of AuNRs. Three layers (layer 1 locates close to the bottom (surface), layer 2 locates in the middle of cells, layer 3 locates in the top of cells) indicate clearly the internalization of AuNRs. (E) Cell viability of MCF-7 cells after 24 h AuNRs and AuNRs+NIR treatments (n=3). (F) Western blotting for the BAX protein upon different treatments (after 24 h).

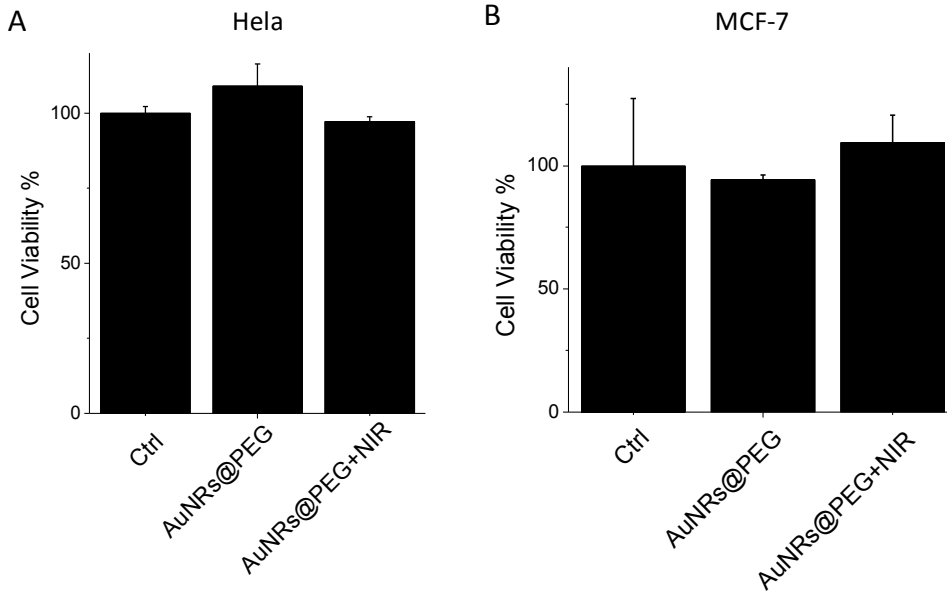

**Figure S3.** Cytotoxicity of non-specifically targeted AuNRs (AuNRs@PEG) on HeLa and MCF-7 cells (n=3).

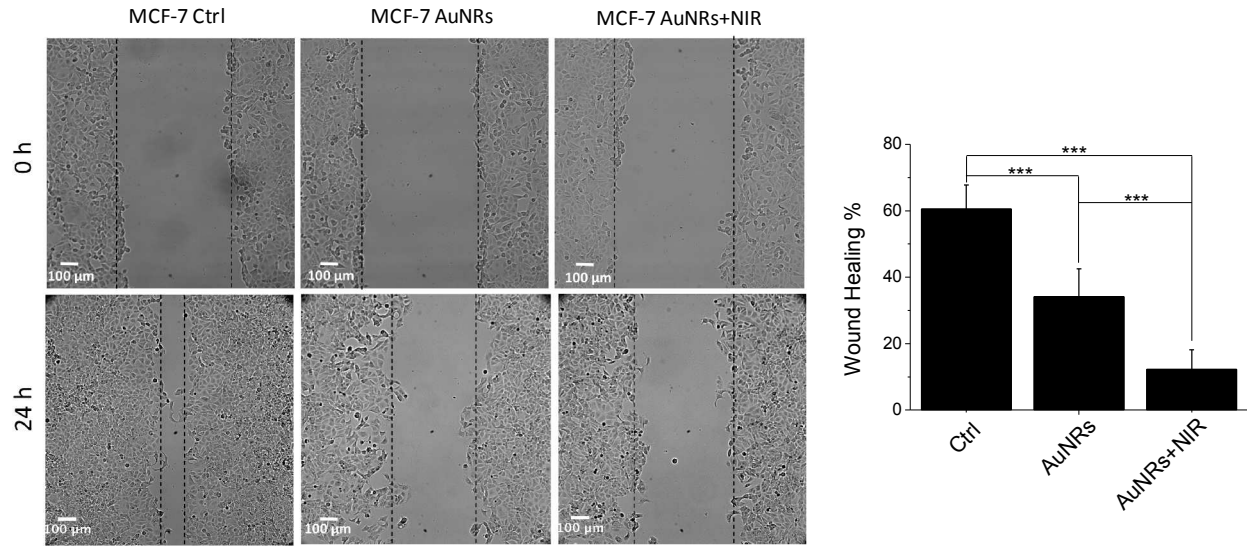

**Figure S4.** Scratch assay images of MCF-7 cells (control, AuNRs treatment, and AuNRs/PPTT treatment) at 0 and 24 h (n=6). Student's t test was used for statistical analysis. All values are expressed as means  $\pm$  standard errors of the mean (SEM). \*\*\*p < 0.001, \*\*p < 0.01, \*p < 0.05.

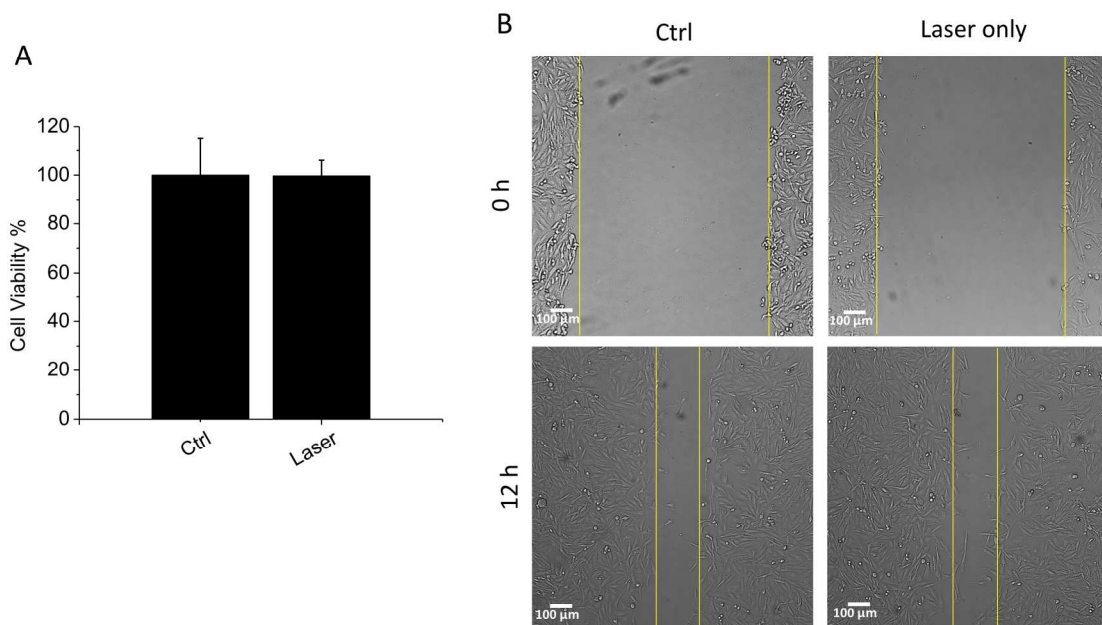

**Figure S5.** (A) HeLa cell viability comparing Ctrl (no treatment) and Laser treatment (no AuNRs added, n=3). (B) Scratch assay images of HeLa cells (Ctrl and Laser treatment) at 0 and 12 h.

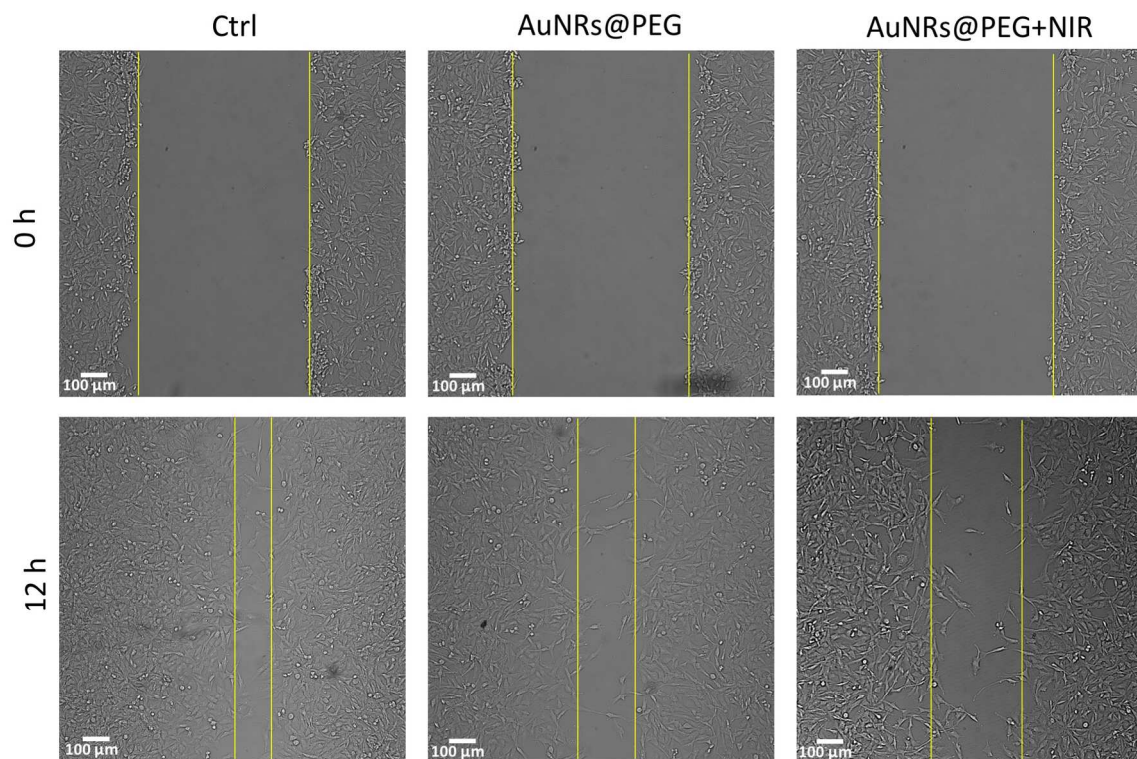

Figure S6. Scratch assay images of HeLa cells (Ctrl, AuNRs@PEG, AuNRs@PEG+NIR treatments) at 0 and 12 h.

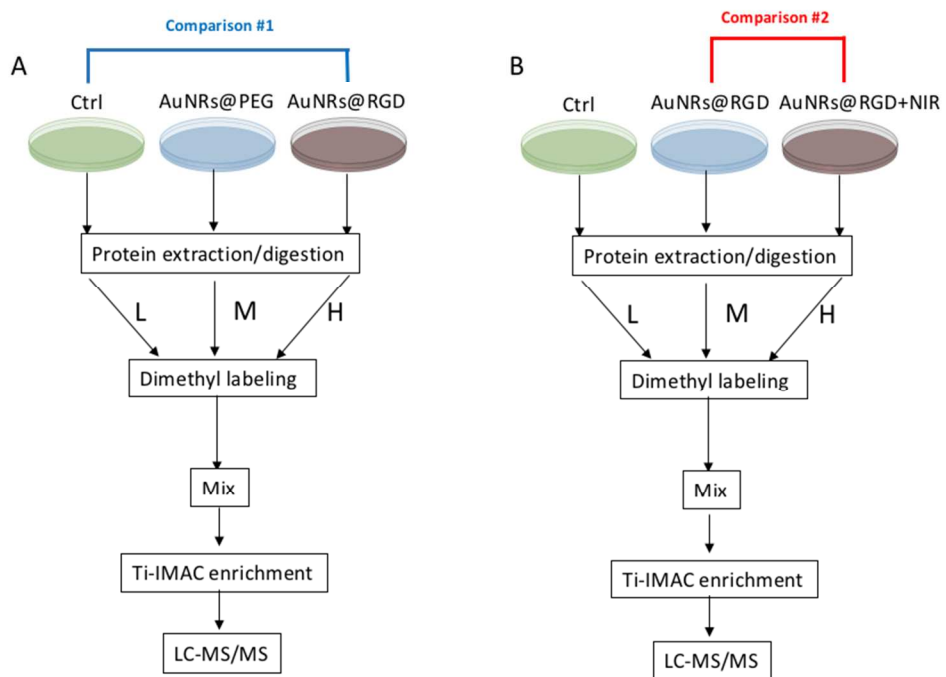

**Figure S7.** Experimental design of quantitative phosphoproteomics. Two sets of experiments were performed to examine the AuNRs and the photothermal effects separately. (A) Studying the protein phosphorylation upon treatments of AuNRs@PEG (30 min stimulation) and AuNRs@RGD (30 min stimulation). (B) Studying the protein phosphorylation upon photothermal effects (30 min stimulation) after overnight incubating the cells with AuNRs@RGD. The comparisons #1 and #2 are indicated in Figure 2.

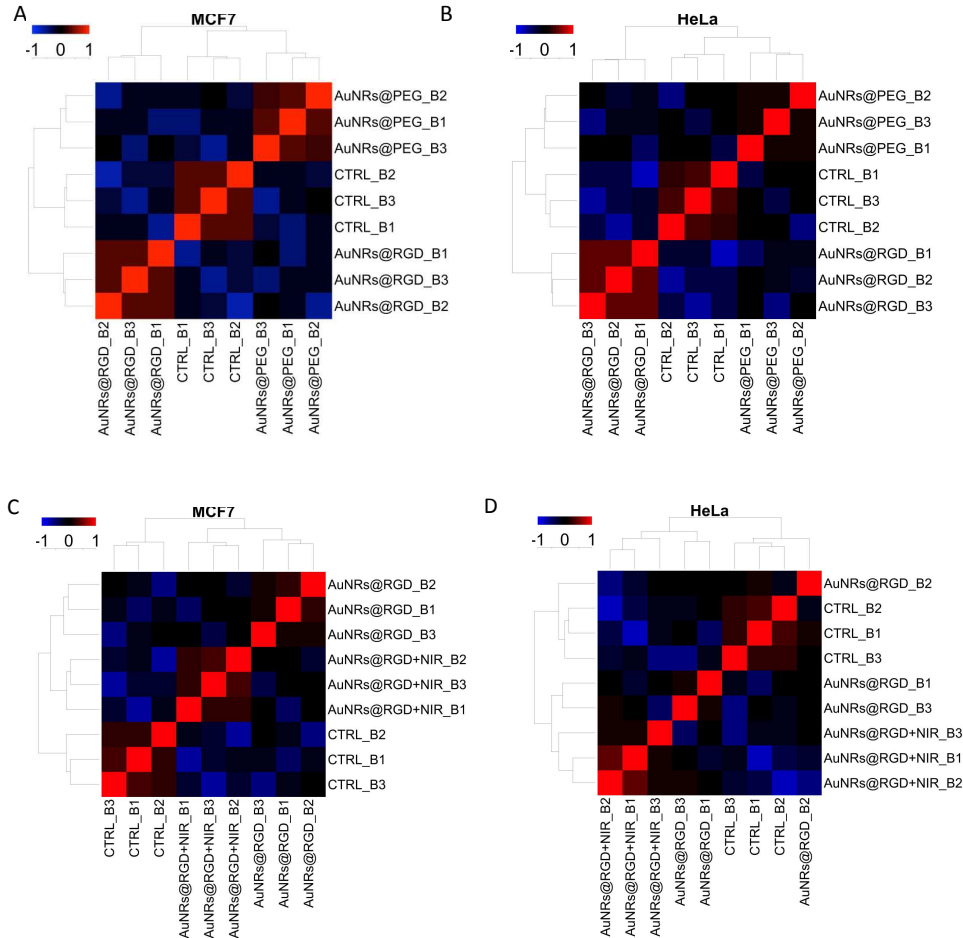

**Figure S8.** Clustering analysis of the samples. (A) AuNRs@PEG, AuNRs@RGD and control for MCF-7. (B) AuNRs@PEG, AuNRs@RGD and control for HeLa. (C) AuNRs@RGD, AuNRs@RGD+NIR, and control for MCF-7. (D) AuNRs@RGD, AuNRs@RGD+NIR, and control for HeLa. B1, B2, and B3 in the figures indicate the three biological replications.



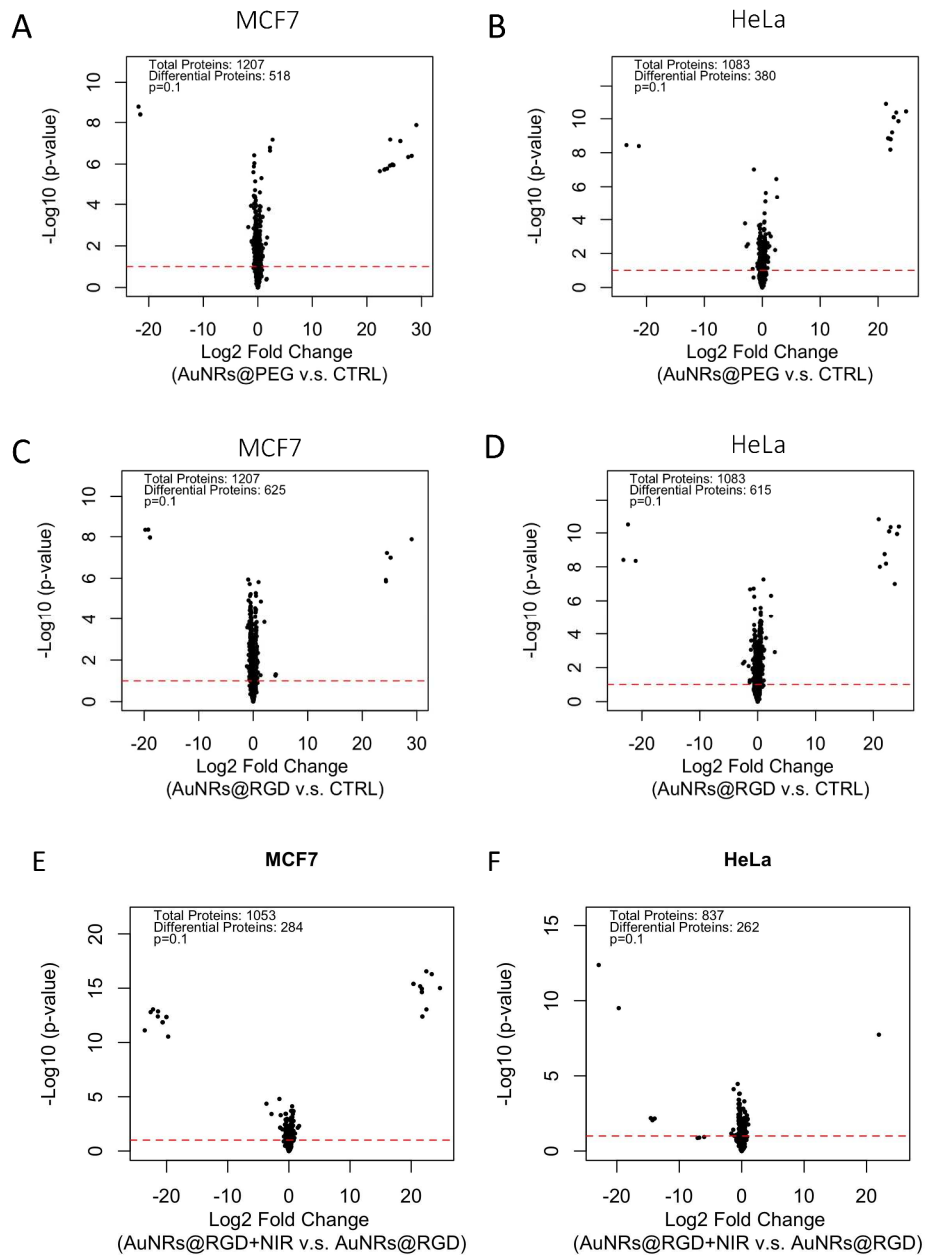

**Figure S9.** Volcano plots of proteins under perturbation by (A) AuNRs@PEG for MCF-7, (B) AuNRs@PEG for HeLa, (C) AuNRs@RGD for MCF-7, (D) AuNRs@RGD for HeLa, (E) AuNRs@RGD+NIR for MCF-7 and (F) AuNRs@RGD+NIR for HeLa.

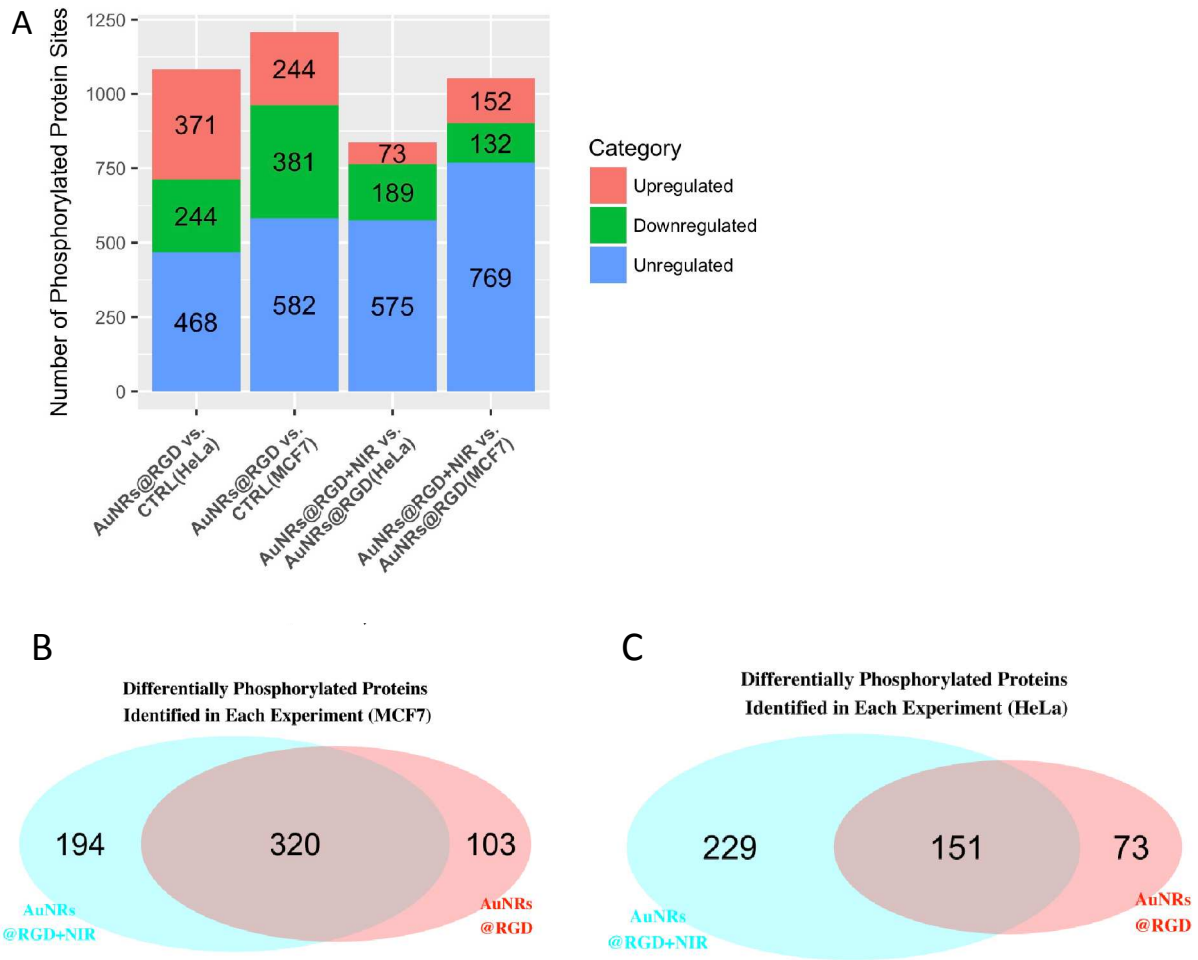

**Figure S10.** (A) Numbers of regulated/unregulated phosphorylated sites identified in each experiment. (B-C) Venn diagram showing the comparison of differentially phosphorylated sites identified in each experiment.

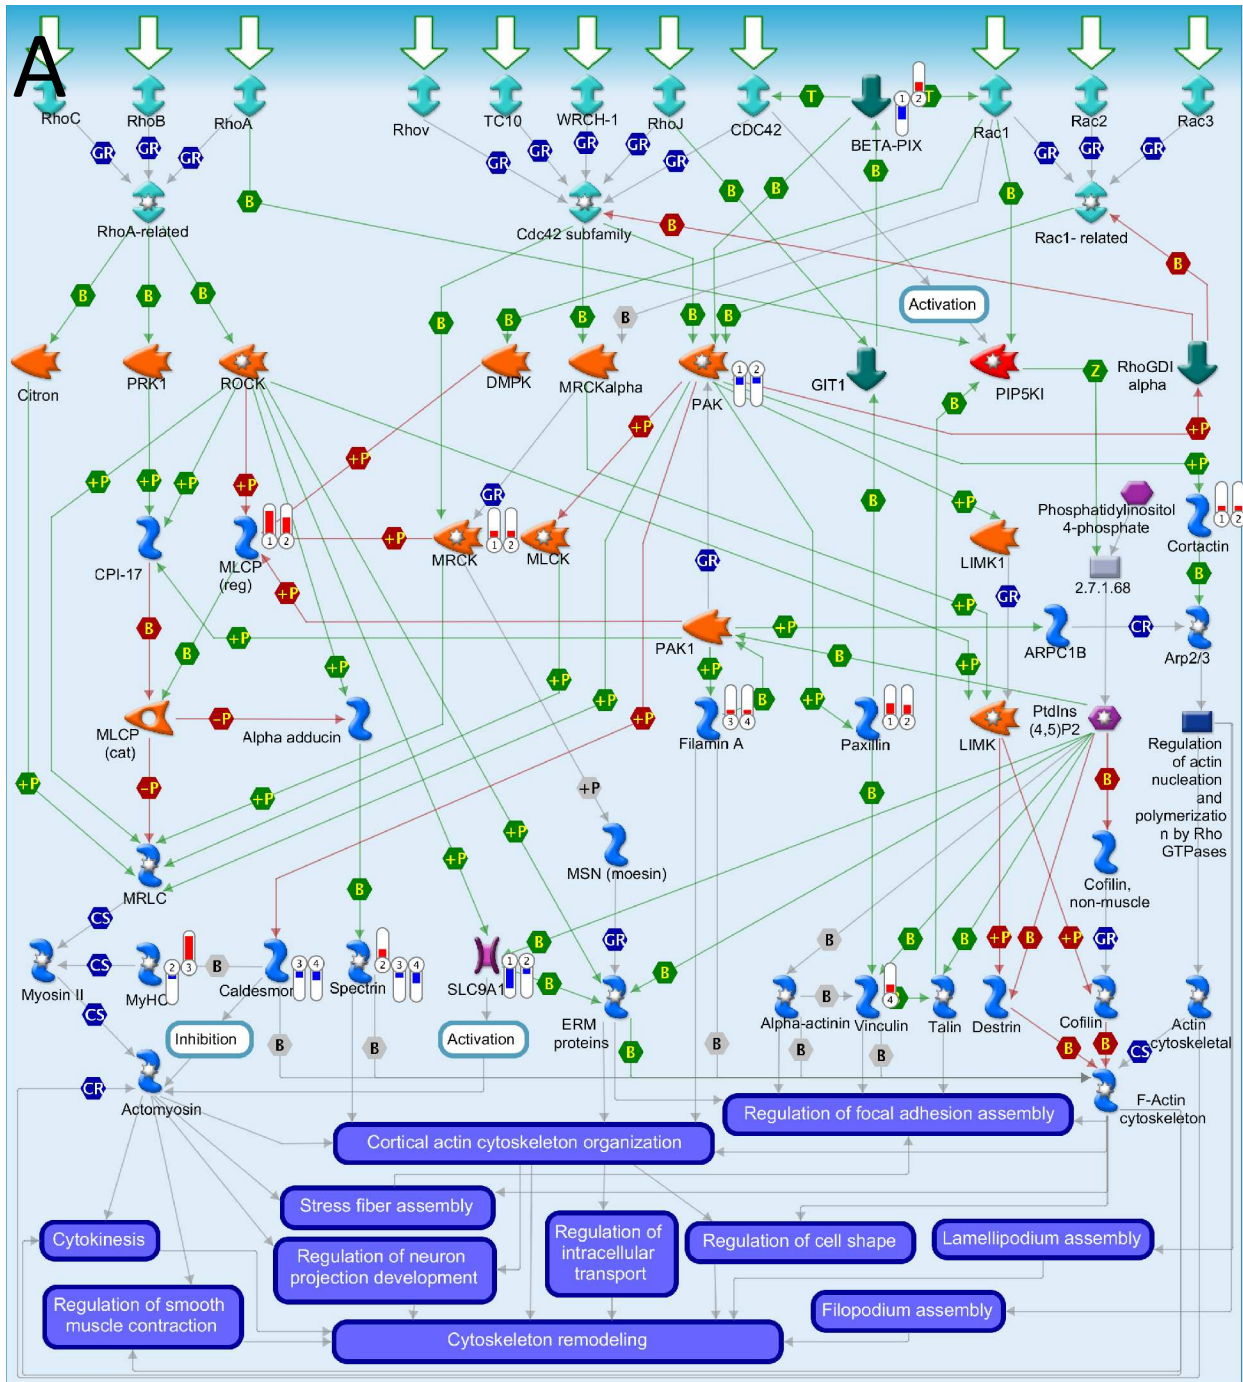

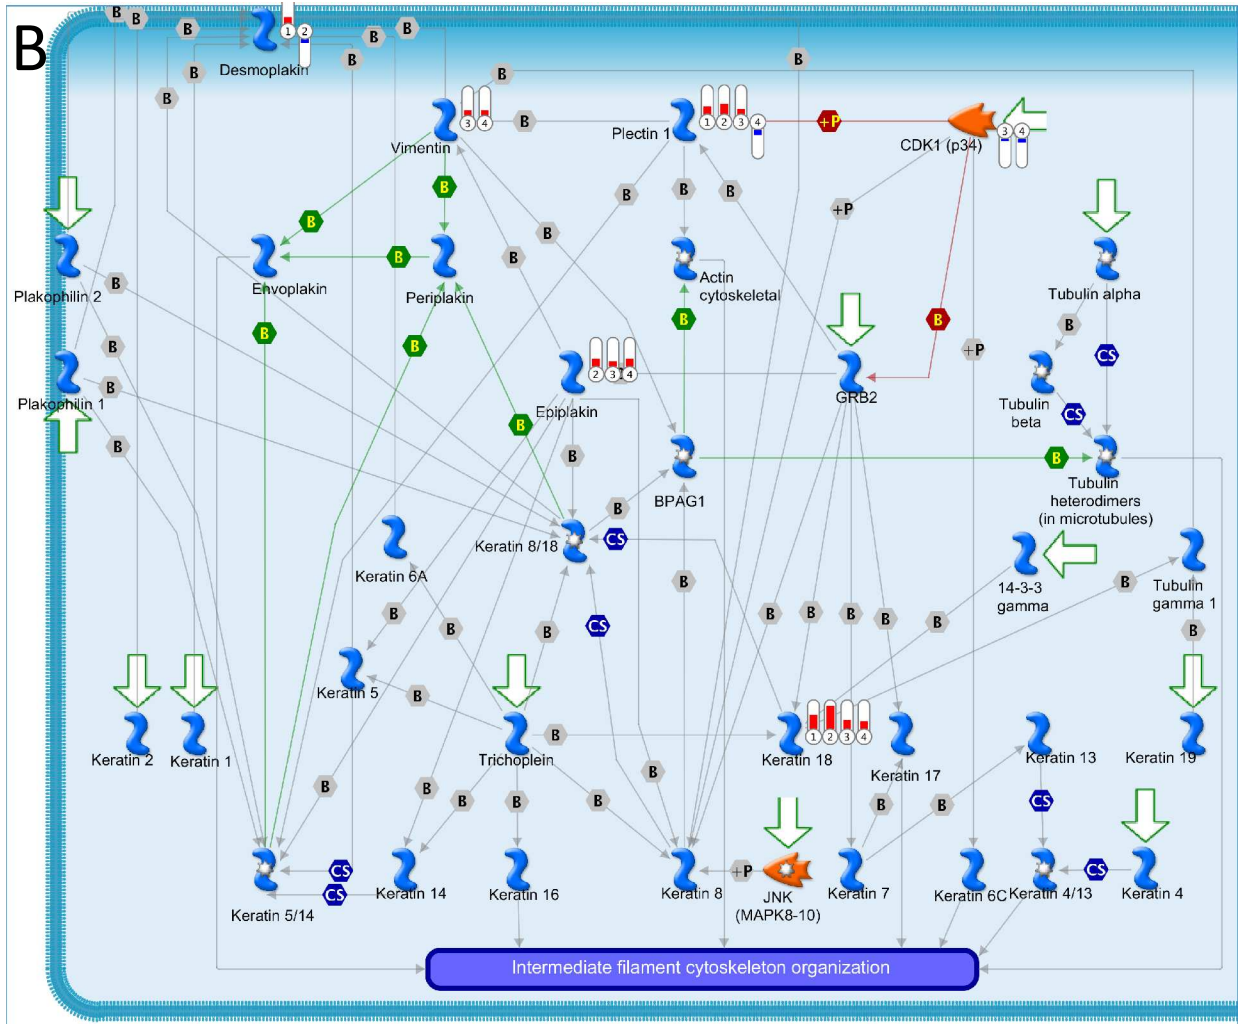

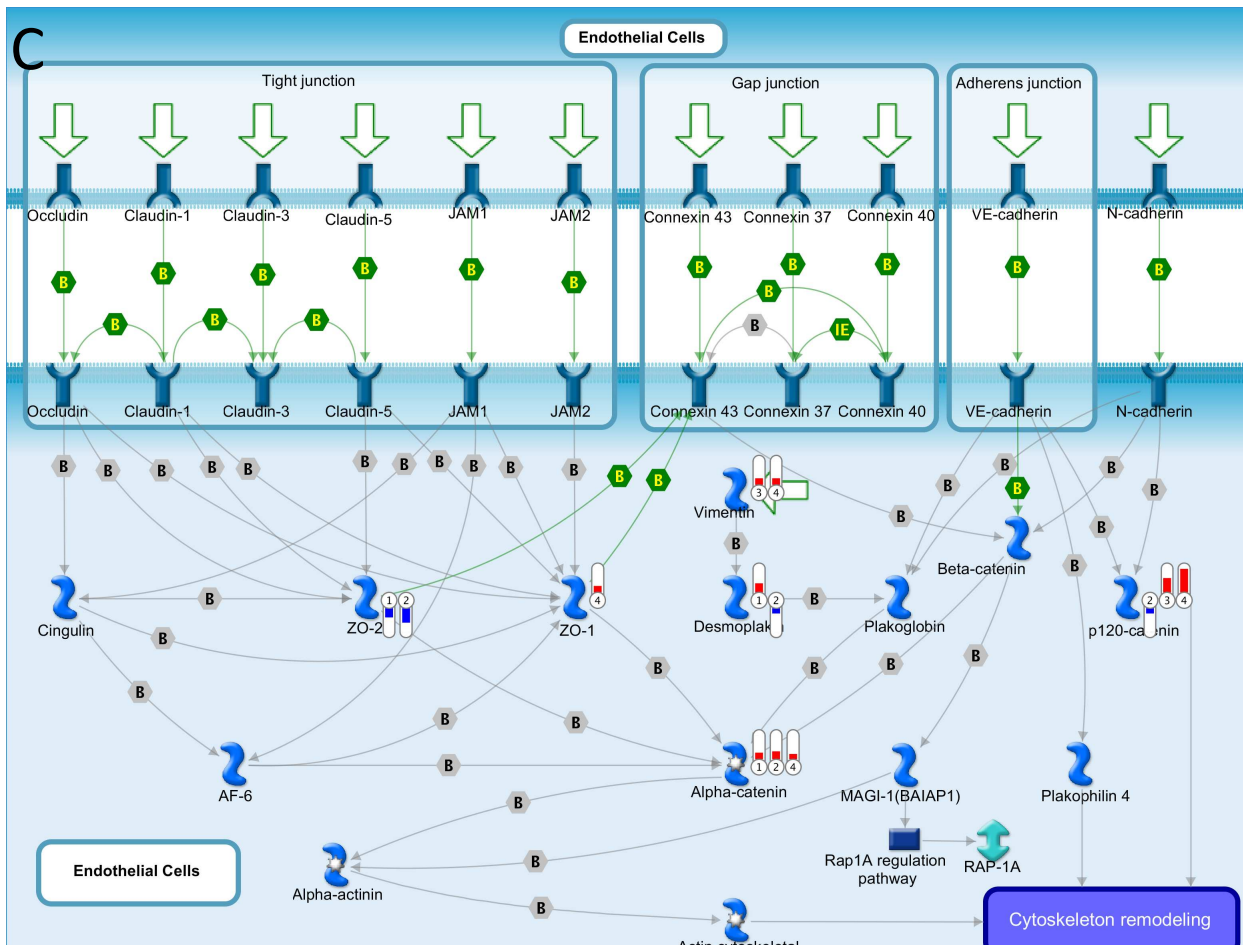

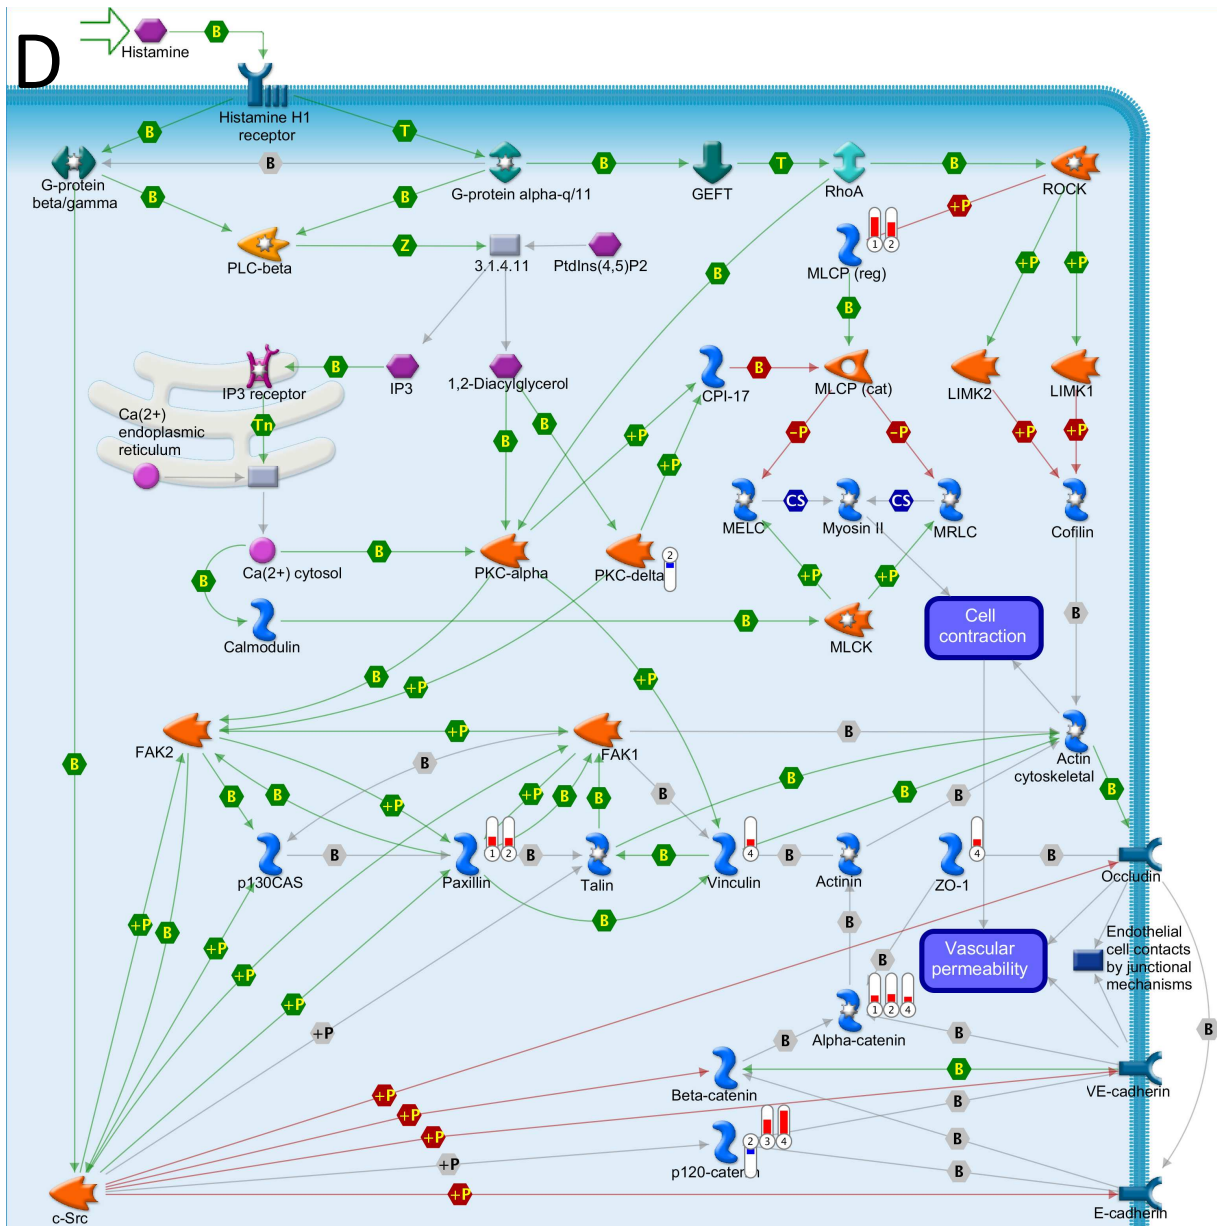

**Figure S11.** Key pathways perturbed by AuNRs (*vs* control group) identified with MetaCore from Thomson Reuters. In the thermometer sign, red means up-regulation and blue means down-regulation. 1 refers to AuNRs@PEG (MCF-7), 2 refers to AuNRs@RGD (MCF-7), 3 refers to AuNRs@PEG (HeLa) and 4 refers to AuNRs@RGD (HeLa). The thermometers are filled to various degrees, corresponding to the amount by which the markers were up-regulated or down-regulated. (A) Pathway map of “Cytoskeleton remodeling\_Regulation of actin cytoskeleton organization by the kinase effectors of Rho GTPases” (B) Pathway map of “Cytoskeleton remodeling\_Keratin filaments.” (C) Pathway map of “Cell adhesion\_Endothelial cell contacts by junctional mechanisms.” (D) Pathway map of “Cell adhesion\_Histamine H1 receptor signaling in the interruption of cell barrier integrity.”

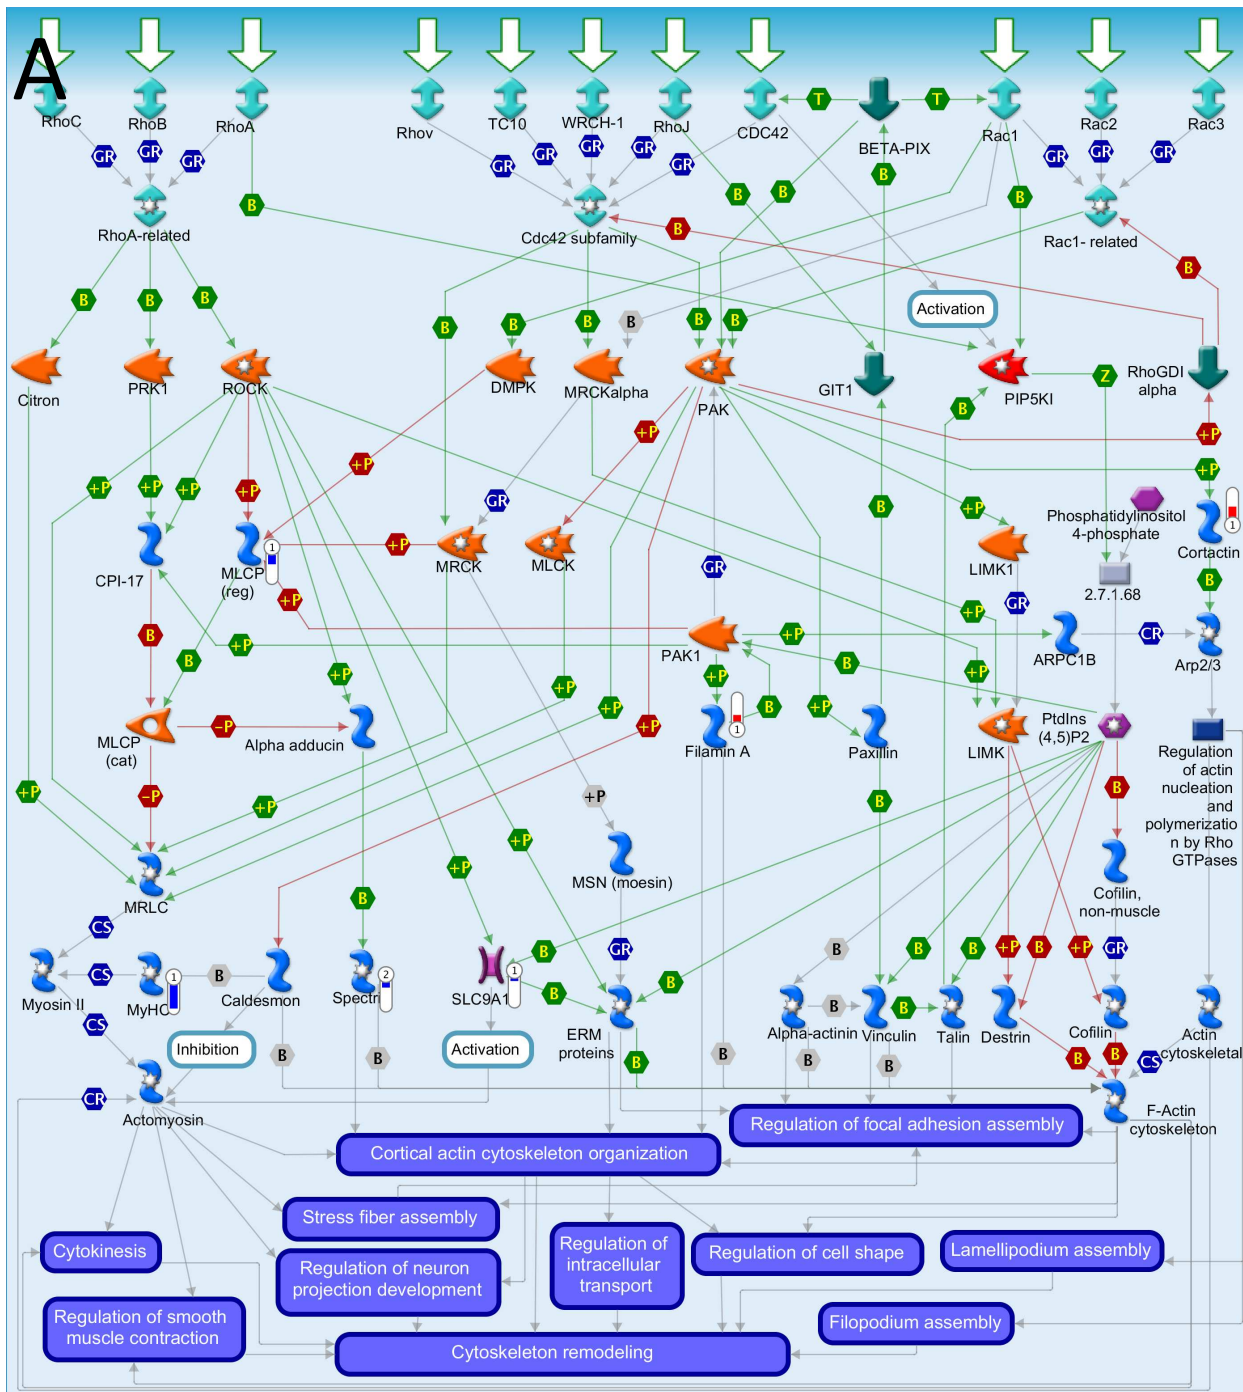

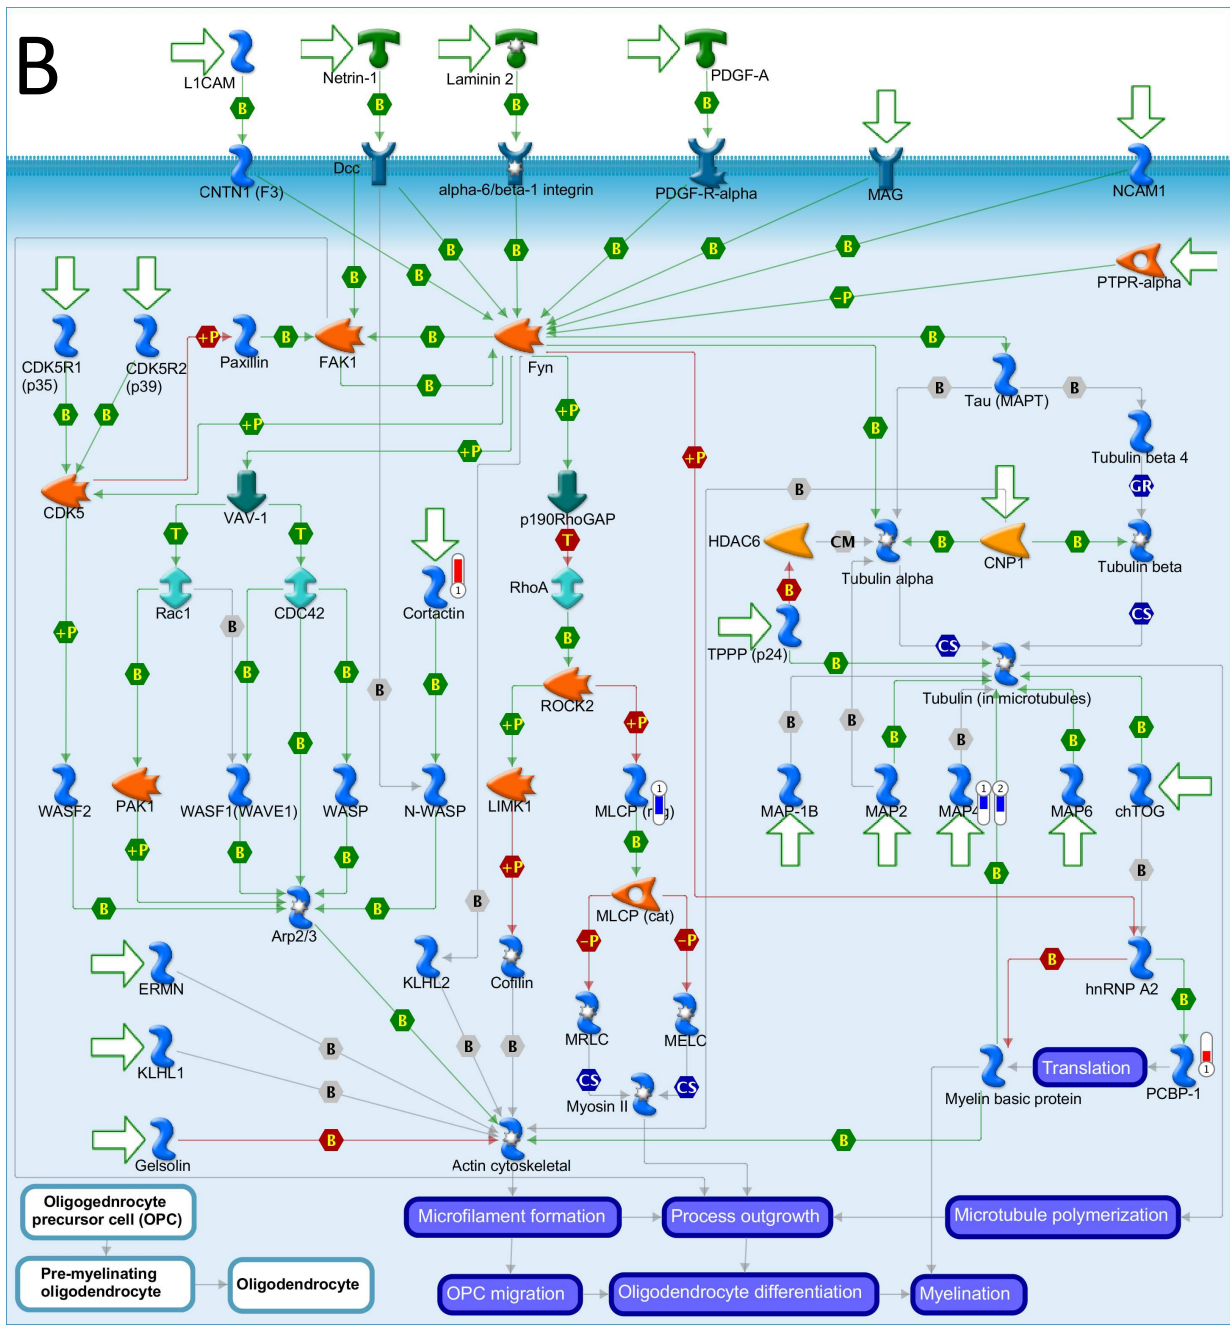



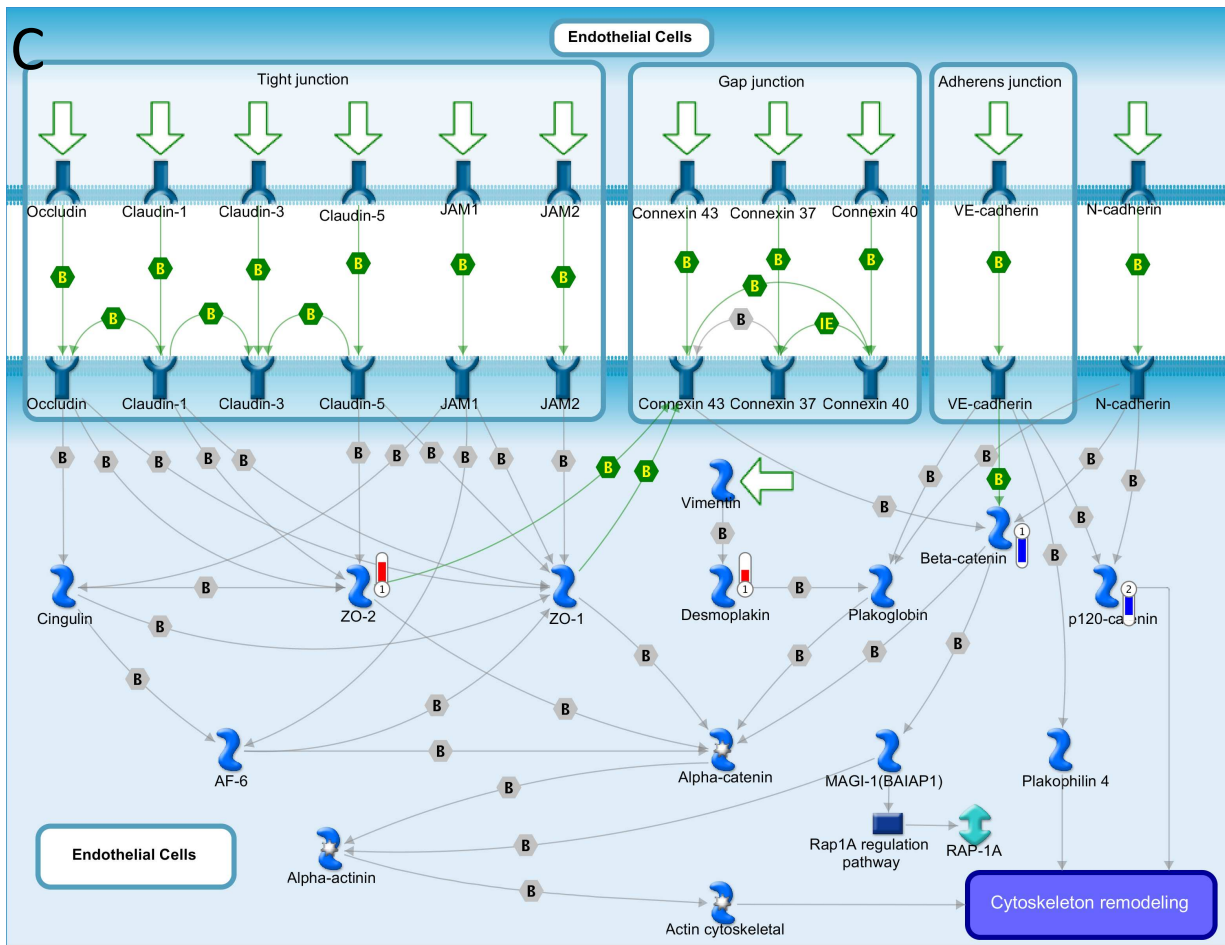

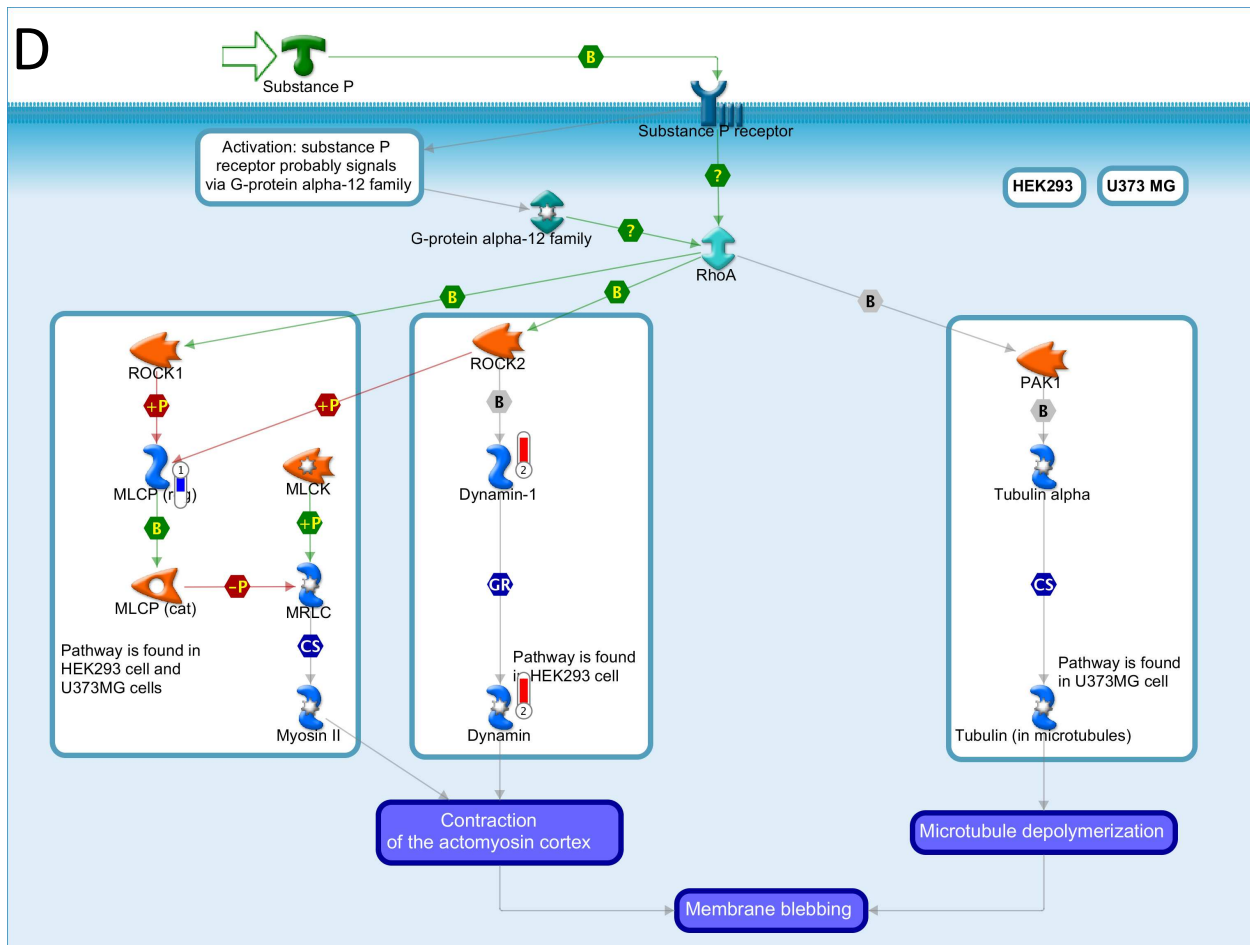

**Figure S12.** Key pathways perturbed by AuNRs+PPTT (*vs* AuNRs group). 1 refers to AuNRs-PPTT (MCF-7), 2 refers to AuNRs-PPTT (HeLa). (A) Pathway map of “Cytoskeleton remodeling\_Regulation of actin cytoskeleton organization by the kinase effectors of Rho GTPases” (B) Pathway map of “Development\_Regulation of cytoskeleton proteins in oligodendrocyte differentiation and myelination” (C) Pathway map of “Cell adhesion\_Endothelial cell contacts by junctional mechanisms” (D) Pathway map of “Cytoskeleton remodeling\_Substance P mediated membrane blebbing”.

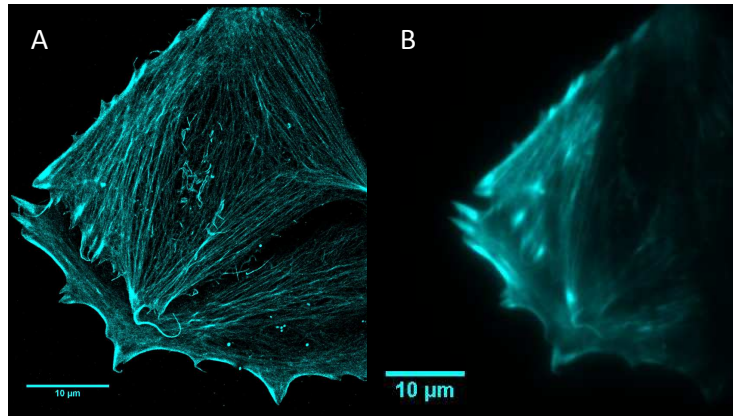

**Figure S13.** Comparison of the resolution of STORM (A) and conventional fluorescence microscopy imaging (B) for actin filaments.

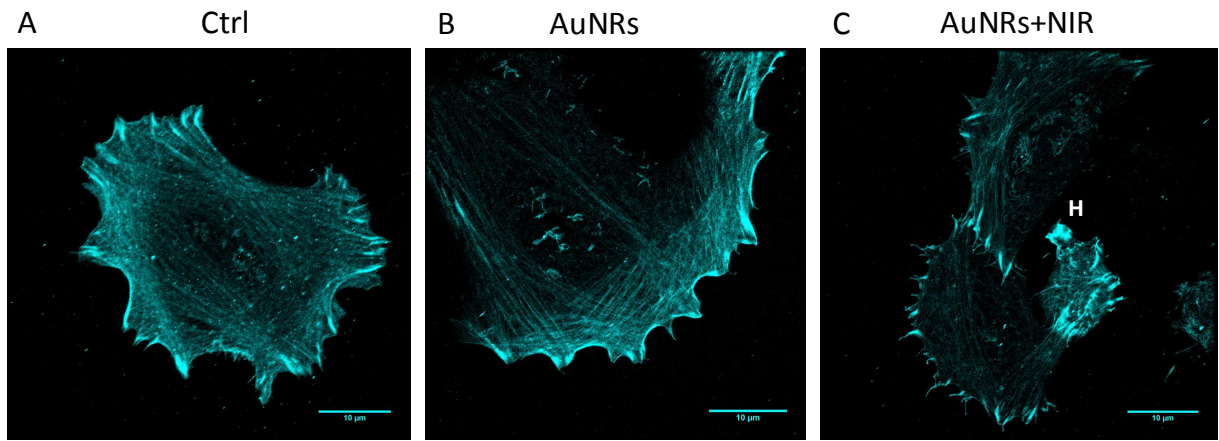

**Figure S14.** STORM images of actin filaments in individual HeLa cells.

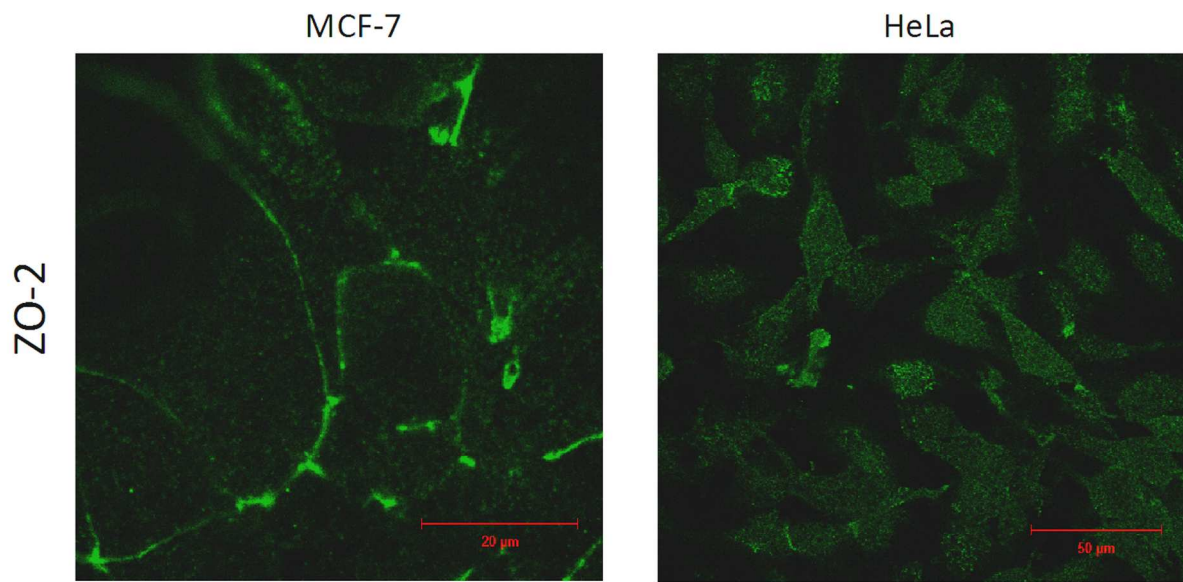

**Figure S15.** Low expression of tight junctions in HeLa cells compared with MCF-7 cells.

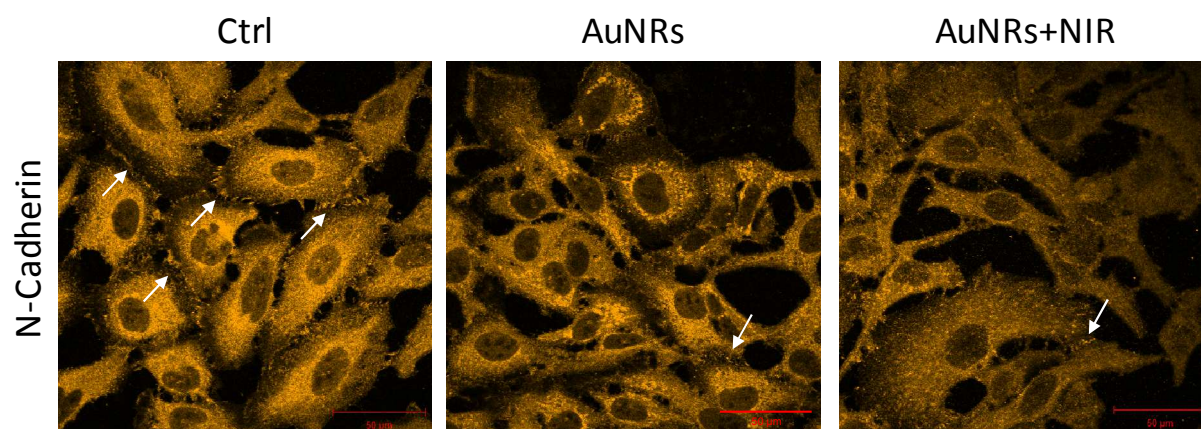

**Figure S16.** Immunofluorescence images of N-cadherin in HeLa cells before and after AuNRs or AuNRs/PPTT treatments. The arrows indicate the N-cadherin junctions.

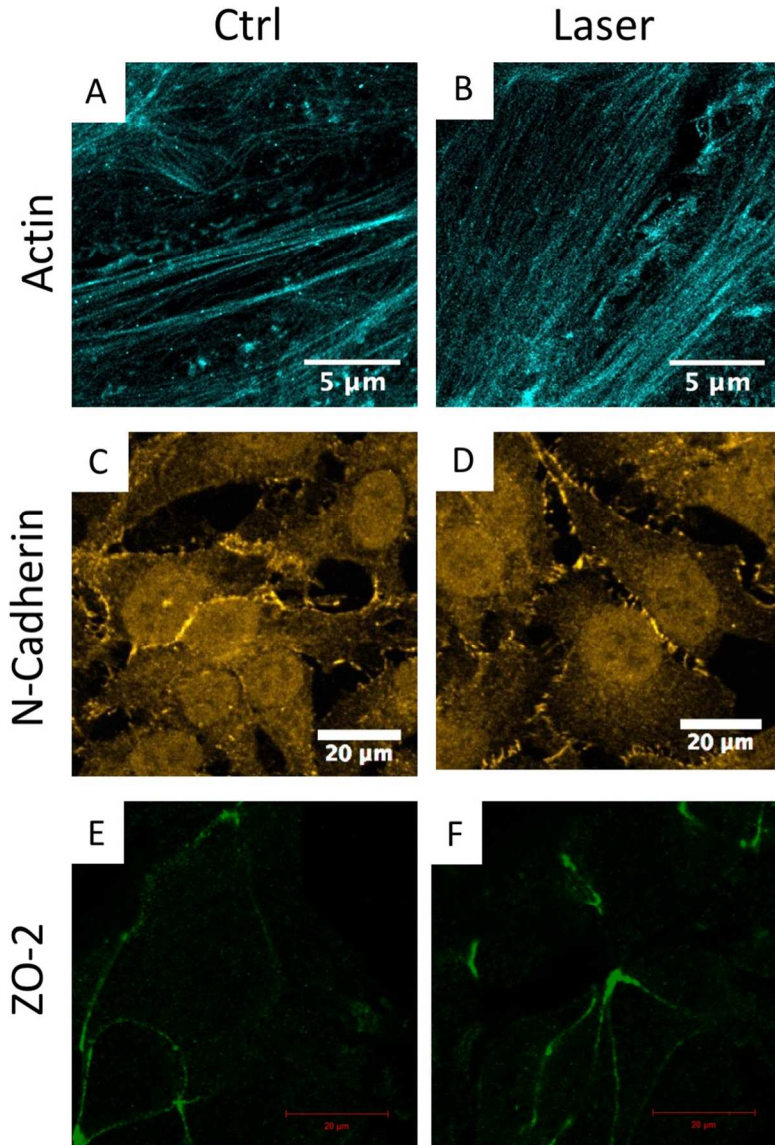

**Figure S17.** STORM images of actin filaments in the cell-cell junction for control (A) and laser control (no AuNRs) (B). Scale bar = 5 μm. Immunofluorescence images of N-cadherin in HeLa cells for control (C) and laser control (no AuNRs) (D). Scale bar = 20 μm. Immunofluorescence images of tight junction protein ZO-2 in MCF-7 cells, for control (E) and laser control (no AuNRs) (F). Scale bar = 20 μm.

**Table S1.** List of selected proteins with their altered phosphorylation sites.

| Category                                 |                         | Protein                                                                                                                            | Protein Function                                                                 | Phosphorylation sites altered  | Phosphorylation sites function                                                                                                                                              |
|------------------------------------------|-------------------------|------------------------------------------------------------------------------------------------------------------------------------|----------------------------------------------------------------------------------|--------------------------------|-----------------------------------------------------------------------------------------------------------------------------------------------------------------------------|
| Actin                                    | Focal adhesions         | Paxillin                                                                                                                           | Form focal adhesions                                                             | pS303, pS302, pS106, pS85      | Increase of pS85 of paxillin could have an important function in cell adhesion <sup>1,2</sup>                                                                               |
|                                          |                         | Zyxin                                                                                                                              |                                                                                  | pS258, pS288, and pS267        | --                                                                                                                                                                          |
|                                          |                         | Vinculin                                                                                                                           |                                                                                  | pS290                          | --                                                                                                                                                                          |
|                                          | Myosin related proteins | MYH9                                                                                                                               | Form stress fibers and create a contraction force in cell migration <sup>3</sup> | pS1943                         | Phosphorylation status of MYH9 at Ser 1943 could alter cell motility , relating to cell junction <sup>4</sup>                                                               |
|                                          |                         | MLCP                                                                                                                               |                                                                                  | pS299, pS445, pS871            | The Ser 445 of MLCP is closely related to cell adhesion <sup>5</sup>                                                                                                        |
|                                          | Actin-binding proteins  | Filamin                                                                                                                            | Actin filament crosslinking protein <sup>6</sup>                                 | pS1084, pS1459, pS1432, pS2112 | --                                                                                                                                                                          |
|                                          |                         | Cortactin                                                                                                                          | Actin-nucleation-promoting factor <sup>7</sup>                                   | pS39, pS52, pT33, pT35, pT45   | --                                                                                                                                                                          |
|                                          |                         | Drebrin                                                                                                                            | Induce stabilization of actin filaments <sup>8</sup>                             | pS142                          | --                                                                                                                                                                          |
|                                          | Microtubule             | MAP4                                                                                                                               | Promoting microtubule assembly, regulating cell invasion/migration <sup>9</sup>  | pS1073, pS787, pS280, pS789    | MAP4 pS1073 is related to cancer cell metastasis potential <sup>10</sup> and pS787 could promote tubulin polymerization <sup>11</sup> thereby changing the MT organization. |
| MAP1B                                    |                         | Microtubule assembly <sup>12</sup>                                                                                                 | pS248, pS250, pS345, pS352, pS367, pS552                                         | --                             |                                                                                                                                                                             |
| GSK3                                     |                         | Regulate microtubule dynamics <sup>13</sup>                                                                                        | pY279                                                                            | --                             |                                                                                                                                                                             |
| Desmosome related intermediate filaments | Keratin 18              | Keratin 18 and its filament partner keratin 8 are regarded as the most commonly found members of the intermediate filament family. | pS34, pT65, pS420, pS42                                                          | --                             |                                                                                                                                                                             |



|                   |                         |                   |                                                                                                                                                                                                  |                                                  |                                                                                  |
|-------------------|-------------------------|-------------------|--------------------------------------------------------------------------------------------------------------------------------------------------------------------------------------------------|--------------------------------------------------|----------------------------------------------------------------------------------|
|                   |                         | Vimentin          | A hallmark protein of epithelial to mesenchymal transition (EMT), which is related to the increase of migration and invasive properties <sup>14, 15</sup>                                        | pS459, pS56, pT458                               | pS56 was reported with the function of cytoskeleton reorganization <sup>16</sup> |
| Kinases           |                         | Raf1              | A MAP kinase kinase kinase (MAP3K), regulates Rho signaling and cell migration <sup>17</sup>                                                                                                     | pS621                                            | --                                                                               |
|                   |                         | MAP2K2            | MAP kinase kinase family                                                                                                                                                                         | pT394                                            | --                                                                               |
|                   |                         | CDK1              | Regulation of cell cycle progression and greatly related to cancer development <sup>18</sup>                                                                                                     | pT14, pY15                                       | --                                                                               |
| Junction proteins | Tight junction proteins | ZO-1              | Connect cytoskeletons of adjacent cells and act as barriers for the passage of molecules and ions <sup>19</sup>                                                                                  | pS125, pS131                                     | --                                                                               |
|                   |                         | ZO-2              |                                                                                                                                                                                                  | pS966, pS986, pS978, pS266, pS986, pS1159, pS130 | --                                                                               |
|                   | Catenins                | $\alpha$ -Catenin | Form cell-cell adhesion complexes, anchoring actin cytoskeleton and interacting with cadherins <sup>20</sup>                                                                                     | pT654, pS641, pT634, pS652, pS655                | S641 affects cell motility <sup>21</sup>                                         |
|                   |                         | $\beta$ -Catenin  |                                                                                                                                                                                                  | pT551 or pT556                                   | --                                                                               |
|                   |                         | p120-Catenin      |                                                                                                                                                                                                  | pS230, pS268, pS349, pS352, pS252                | --                                                                               |
|                   | Desmosomes              | Desmoplakin       | Desmosome protein, confer strong cell-cell adhesion,                                                                                                                                             | pS22, pY172, pT173, pS166, pS176, pS2821, pS2825 | --                                                                               |
|                   |                         | Epiplakin         | Epiplakin, and plectin connect and reorganize the intermediate filaments, such as keratins <sup>22-24</sup> , to the desmosome, which are also closely related to cell motility <sup>25 26</sup> | pS2716                                           | --                                                                               |
|                   |                         | Plectin           |                                                                                                                                                                                                  | pS4386, pS4385, pS4616, pS4396, pS4389           | --                                                                               |

-- No information

## Supplementary References

- (1) Efimov, A.; Schiefermeier, N.; Grigoriev, I.; Ohi, R.; Brown, M. C.; Turner, C. E.; Small, J. V.; Kaverina, I., Paxillin-Dependent Stimulation of Microtubule Catastrophes at Focal Adhesion Sites. *J. Cell. Sci.* **2008**, *121*, 196-204.
- (2) Kwak, T. K.; Lee, M. S.; Ryu, J.; Choi, Y. J.; Kang, M.; Jeong, D.; Lee, J. W., Cell Adhesion-Dependent Serine 85 Phosphorylation of Paxillin Modulates Focal Adhesion Formation and Haptotactic Migration via Association with the C-Terminal Tail Domain of Talin. *J. Biol. Chem.* **2012**, *287*, 27499-27509.
- (3) Murrell, M.; Oakes, P. W.; Lenz, M.; Gardel, M. L., Forcing Cells into Shape: the Mechanics of Actomyosin Contractility. *Nat. Rev. Mol. Cell Biol.* **2015**, *16*, 486-498.
- (4) Dulyaninova, N. G.; House, R. P.; Betapudi, V.; Bresnick, A. R., Myosin-IIA Heavy-Chain Phosphorylation Regulates the Motility of MDA-MB-231 Carcinoma Cells. *Mol. Biol. Cell* **2007**, *18*, 3144-3155.
- (5) Zagórska, A.; Deak, M.; Campbell, D. G.; Banerjee, S.; Hirano, M.; Aizawa, S.; Prescott, A. R.; Alessi, D. R., New Roles for the LKB1-NUAK Pathway in Controlling Myosin Phosphatase Complexes and Cell Adhesion. *Sci. Signal.* **2010**, *3*, ra25.
- (6) Nakamura, F.; Stossel, T. P.; Hartwig, J. H., The Filamins: Organizers of Cell Structure and Function. *Cell Adh. Migr.* **2011**, *5*, 160-169.
- (7) MacGrath, S. M.; Koleske, A. J., Cortactin in Cell Migration and Cancer at a Glance. *J. Cell Sci.* **2012**, *125*, 1621-1626.
- (8) Mikati, M. A.; Grintsevich, E. E.; Reisler, E., Drebrin-Induced Stabilization of Actin Filaments. *J. Biol. Chem.* **2013**, *288*, 19926-19938.
- (9) Jiang, Y. Y.; Shang, L.; Shi, Z. Z.; Zhang, T. T.; Ma, S.; Lu, C. C.; Zhang, Y.; Hao, J. J.; Shi, C.; Shi, F.; Xu, X.; Cai, Y.; Jia, X. M.; Zhan, Q. M.; Wang, M. R., Microtubule-Associated Protein 4 is an Important Regulator of Cell Invasion/Migration and a Potential Therapeutic Target in Esophageal Squamous Cell Carcinoma. *Oncogene* **2016**, *35*, 4846-4856.
- (10) Wang, Y. T.; Tsai, C. F.; Hong, T. C.; Tsou, C. C.; Lin, P. Y.; Pan, S. H.; Hong, T. M.; Yang, P. C.; Sung, T. Y.; Hsu, W. L.; Chen, Y. J., An Informatics-Assisted Label-Free Quantitation Strategy That Depicts Phosphoproteomic Profiles in Lung Cancer Cell Invasion. *J. Proteome Res.* **2010**, *9*, 5582-5597.
- (11) Kitazawa, H.; Iida, J.; Uchida, A.; Haino-Fukushima, K.; Itoh, T. J.; Hotani, H.; Ookata, K.; Murofushi, H.; Bulinski, J. C.; Kishimoto, T.; Hisanaga, S., Ser787 in the Proline-Rich Region of Human MAP4 is a Critical Phosphorylation Site That Reduces its Activity to Promote Tubulin Polymerization. *Cell Struct. Funct.* **2000**, *25*, 33-39.
- (12) da Silva, A. F.; Mariotti, F. R.; Máximo, V.; Campello, S., Mitochondria Dynamism: of Shape, Transport and Cell Migration. *Cell Mol. Life Sci.* **2014**, *71*, 2313-2324.
- (13) Buttrick, G. J.; Wakefield, J. G., PI3-K And GSK-3: Akt-Ing Together with Microtubules. *Cell Cycle* **2008**, *7*, 2621-2625.
- (14) Mendez, M. G.; Kojima, S.; Goldman, R. D., Vimentin Induces Changes in Cell Shape, Motility, and Adhesion During the Epithelial to Mesenchymal Transition. *FASEB J* **2010**, *24*, 1838-1851.
- (15) Rogel, M. R.; Soni, P. N.; Troken, J. R.; Sitikov, A.; Trejo, H. E.; Ridge, K. M., Vimentin is Sufficient and Required for Wound Repair and Remodeling in Alveolar Epithelial Cells. *FASEB J* **2011**, *25*, 3873-3883.

- (16) Li, Q. F.; Spinelli, A. M.; Wang, R.; Anfinogenova, Y.; Singer, H. A.; Tang, D. D., Critical Role of Vimentin Phosphorylation at Ser-56 by P21-Activated Kinase in Vimentin Cytoskeleton Signaling. *J. Biol. Chem.* **2006**, *281*, 34716-34724.
- (17) Ehrenreiter, K.; Piazzolla, D.; Velamoor, V.; Sobczak, I.; Small, J. V.; Takeda, J.; Leung, T.; Baccharini, M., Raf-1 Regulates Rho Signaling and Cell Migration. *J. Cell Biol.* **2005**, *168*, 955-964.
- (18) Peyressatre, M.; Prével, C.; Pellerano, M.; Morris, M. C., Targeting Cyclin-Dependent Kinases in Human Cancers: from Small Molecules to Peptide Inhibitors. *Cancers (Basel)* **2015**, *7*, 179-237.
- (19) Zihni, C.; Mills, C.; Matter, K.; Balda, M. S., Tight Junctions: from Simple Barriers to Multifunctional Molecular Gates. *Nat. Rev. Mol. Cell Biol.* **2016**, *17*, 564-580.
- (20) Hartsock, A.; Nelson, W. J., Adherens and Tight Junctions: Structure, Function and Connections to the Actin Cytoskeleton. *Biochim. Biophys. Acta* **2008**, *1778*, 660-669.
- (21) Ji, H.; Wang, J.; Nika, H.; Hawke, D.; Keezer, S.; Ge, Q.; Fang, B.; Fang, X.; Fang, D.; Litchfield, D. W.; Aldape, K.; Lu, Z., EGF-Induced ERK Activation Promotes CK2-Mediated Disassociation of Alpha-Catenin from Beta-Catenin and Transactivation of Beta-Catenin. *Mol. Cell* **2009**, *36*, 547-559.
- (22) Huber, O., Structure and Function of Desmosomal Proteins and Their Role in Development and Disease. *Cell Mol. Life Sci.* **2003**, *60*, 1872-1890.
- (23) Wang, W.; Sumiyoshi, H.; Yoshioka, H.; Fujiwara, S., Interactions Between Epiplakin and Intermediate Filaments. *J. Dermatol.* **2006**, *33*, 518-527.
- (24) Ishikawa, K.; Sumiyoshi, H.; Matsuo, N.; Takeo, N.; Goto, M.; Okamoto, O.; Tatsukawa, S.; Kitamura, H.; Fujikura, Y.; Yoshioka, H.; Fujiwara, S., Epiplakin Accelerates the Lateral Organization of Keratin Filaments During Wound Healing. *J. Dermatol. Sci.* **2010**, *60*, 95-104.
- (25) Leduc, C.; Etienne-Manneville, S., Intermediate Filaments in Cell Migration and Invasion: The Unusual Suspects. *Curr. Opin. Cell Biol.* **2015**, *32*, 102-112.
- (26) Chu, Y. W.; Runyan, R. B.; Oshima, R. G.; Hendrix, M. J., Expression of Complete Keratin Filaments in Mouse L Cells Augments Cell Migration and Invasion. *Proc. Natl. Acad. Sci. U S A* **1993**, *90*, 4261-4265.
